# Supplementary material for: Development of a 50K SNP array for whole-genome analysis and its application in the genetic localization of eggplant (Solanum melongena L.) fruit shape
Source: Front Plant Sci. 2024 Nov 25;15:1492242. doi: 10.3389/fpls.2024.1492242 (PMC11629150; doi:10.3389/fpls.2024.1492242)
Supplement: Supplementary file 6 [file Table3.xlsx]

## Sheet: Sheet1
Table S3. whole-genome sequencing data statistics.
sample name	Total_Reads	clean data(G)	Q20%	Q30%	GC%	Mapped-rate(%)	Coverage(%)	Aver-dep(×)
E452	86312690	12.9469	97.13	91.95	38.01	98.55	80.05	11
sm624	227137112	34.0706	94.24	83.97	36.83	99.68	97.59	25.35
E3	76340912	11.4511	97.01	91.57	36.42	99.29	98.55	10.08
103	83302930	12.4954	97.77	93.22	36.44	99.68	97.91	11.04
145	78030412	11.7046	97.67	93	36.49	99.39	98.65	10.31
112	80669060	12.1004	97.67	92.98	36.72	99.58	97.61	10.57
E421	76958674	11.5438	96.49	90.48	36.97	93.91	98.25	9.6
E207	75280516	11.2921	96.95	91.49	37.03	94.77	98.15	9.48
222	78517728	11.7777	97.72	93.13	36.72	99.02	98.1	10.34
E39	75030848	11.2546	96.54	90.87	36.26	97.23	98.11	9.68
213	80514796	12.0772	97.75	93.16	36.51	98.52	98.23	10.56
101	81558344	12.2338	97.13	91.8	36.51	98.84	98.26	10.72
10	80797314	12.1196	97.68	92.93	36.79	99.79	98.55	10.72
E116	81694642	12.2542	97.78	93.53	36.97	92.64	98.48	10.07
E459	87034732	13.0552	96.54	90.84	36.65	99.6	98.78	11.47
E396	79666316	11.9499	98.34	94.74	37.08	95.54	98.27	10.14
E240	72552744	10.8829	97.15	92.11	37.48	96.05	98.11	9.27
E298	79281630	11.8922	97.81	93.56	36.78	98.96	98.46	10.44
E465	74445836	11.1669	96.96	91.48	37.12	97.39	98.38	9.64
79	86747370	13.0121	97.76	93.23	36.47	98.95	98.43	11.42
E163	93351626	14.0027	97.42	92.47	36.82	99.05	98.65	12.3
85	82960986	12.4441	97.44	92.47	36.72	99.21	99.03	10.95
E445	77827804	11.6742	97.56	92.83	37.29	98.79	98.52	10.18
E432	79371700	11.9058	97.13	91.81	36.99	99.39	98.01	10.49
E222	70161114	10.5242	97.64	93.13	37.86	95.3	97.89	8.89
E218	74208272	11.1312	97.22	92.31	38.54	93.84	98.01	9.2
E31	75031838	11.2548	96.91	91.71	36.98	95.47	98.24	9.5
102	77734708	11.6602	97.72	93.11	36.2	99.82	98.37	10.33
224	78901446	11.8352	97.71	93.05	36.41	99.72	99	10.47
122	82025570	12.3038	97.65	92.92	36.72	99.26	98.65	10.8
E4	77845124	11.6768	97.24	92.08	36.83	98.29	98.33	10.08
84	83055104	12.4583	97.76	93.19	36.8	99.56	98.14	10.93
89	98176804	14.7265	97.74	93.13	36.6	99.43	98.63	12.99
110	76510752	11.4766	97.46	92.55	36.77	99.58	98.43	9.99
E469	74451992	11.1678	97.14	91.86	37.07	95.88	98.63	9.48
208	85352354	12.8029	97.77	93.13	36.61	99.73	98.45	11.3
113	81678350	12.2518	97.88	93.39	36.36	99.71	98.23	10.85
217	79297026	11.8946	97.71	93.04	36.55	99.7	98.3	10.53
195	83085518	12.4628	97.82	93.31	36.63	99.79	98.33	11
18	79889418	11.9834	97.77	93.17	36.48	99.68	99.1	10.61
62	85018102	12.7527	97.97	93.66	36.46	99	99	11.21
E89	64800290	9.72004	97.49	92.68	37.22	96.4	97.94	8.32
E450	76969190	11.5454	96.94	91.34	37.39	97.08	98.21	9.93
134	79212818	11.8819	97.74	93.17	36.34	99.75	98.93	10.49
E29	64381630	9.65724	97.34	92.52	36.96	97.89	97.57	8.37
167	82984882	12.4477	97.84	93.36	36.53	99.19	98.11	10.94
140	77729228	11.6594	97.69	93.04	36.62	98.9	98.11	10.22
123	78657480	11.7986	97.35	92.29	36.83	99.67	98.97	10.42
E293	79266112	11.8899	97.73	93.31	36.86	99.33	98.23	10.47
109	80389098	12.0584	97.37	92.31	36.66	99.78	98.2	10.66
8	80637288	12.0956	97.79	93.23	37.05	99.55	98.86	10.53
17	81042590	12.1564	97.81	93.29	37.03	99.55	98.66	10.6
E402	80881578	12.1322	98.4	94.77	37.15	98.45	98.11	10.48
108	78140932	11.7211	97.74	93.2	37.19	99.76	98.49	10.21
E2	82193090	12.329	97.28	92.15	36.64	99.01	98.24	10.82
21	80698924	12.1048	97.69	93.01	36.94	99.39	98.18	10.67
E9	76018942	11.4028	97.49	92.65	36.59	96.7	98.17	9.78
E8	68264198	10.2396	97.52	92.69	37.06	97.23	98.02	8.84
142	83109572	12.4664	97.58	92.78	36.57	99.38	98.96	10.98
23	81666492	12.25	97.91	93.47	36.58	99.9	99.13	10.87
E463	73230752	10.9846	97.15	91.86	36.9	99.15	98.17	9.65
E464	75820206	11.373	97.4	92.5	36.91	97.15	98.57	9.8
146	77810046	11.6715	97.62	92.86	36.4	99.75	98.51	10.34
E7	74138068	11.1207	97.38	92.48	36.99	93.62	98.03	9.23
107	75185188	11.2778	97.76	93.25	36.59	99.74	98.62	9.99
E6	40557592	6.08364	98.06	94.05	36.52	97.21	51.53	1.02
104	81353894	12.2031	97.8	93.23	36.14	99.69	98.39	10.8
199	84260782	12.6391	97.56	92.71	36.94	98.34	98.37	11.02
11	81609710	12.2415	97.56	92.73	36.8	98.59	98.32	10.69
E320	68698322	10.3047	97.94	93.77	38.13	94.22	98.25	8.59
E300	93616890	14.0425	97.65	93.13	37.58	94.05	98.64	11.66
E250	76533160	11.48	97.59	93.02	37.22	97.95	98.29	9.96
E247	78635730	11.7954	97.33	92.46	37.1	97.27	98.44	10.16
E312	77789598	11.6684	98	94.01	37.2	91.33	98.18	9.42
139	78440834	11.7661	97.41	92.39	36.62	99.58	98.45	10.39
56	86735602	13.0103	97.65	92.95	36.37	99.03	98.51	11.43
E456	76358782	11.4538	97.2	92.01	37.5	95.82	98.24	9.69
E461	87236742	13.0855	96.95	91.71	37.13	97.5	98.31	11.29
E188	75573570	11.336	97.31	92.22	37.18	97.04	98.22	9.75
13	80540052	12.081	97.7	93.06	36.91	98.32	98.59	10.54
E307	87187858	13.0782	97.97	93.85	39.19	91.06	98.15	10.53
E377	78622204	11.7933	98.07	94	37.16	98.35	98.28	10.28
E373	77433904	11.6151	98.11	94.08	38.5	92.51	97.94	9.52
E341	62919098	9.43786	97.43	92.75	37.04	97.24	97.71	8.13
E309	75810152	11.3715	97.86	93.59	37.21	96.62	98.19	9.73
E358	74601374	11.1902	97.57	93.04	36.93	95.44	98.19	9.44
31	78868256	11.8302	97.77	93.26	36.73	98.71	98.41	10.35
E394	77517468	11.6276	98.03	93.88	36.69	99.48	98.35	10.26
E414	75899168	11.3849	98.25	94.42	36.82	96.83	98.42	9.79
E385	69617904	10.4427	98.32	94.59	37.59	92.69	98.01	8.59
E415	93759102	14.0639	97.74	93.14	36.9	97.79	98.48	12.21
E13	73432042	11.0148	97.24	92.17	36.91	91.46	98.23	8.93
35	86331038	12.9497	97.64	92.95	37.04	97.91	98.6	11.24
34	81330846	12.1996	97.8	93.32	36.84	99.4	98.44	10.71
20	80743858	12.1116	97.79	93.27	36.83	98.49	98.48	10.59
E359	63806792	9.57102	97.48	92.71	37.34	96.49	97.14	8.19
19	80753088	12.113	97.71	93	36.67	98.53	98.51	10.59
E379	79331268	11.8997	97.83	93.46	37.68	94.43	98.65	9.97
E282	69654546	10.4482	97.7	93.22	37.94	95.06	97.68	8.79
E383	78291544	11.7437	97.98	93.76	36.86	98.24	98.34	10.24
E384	79180352	11.8771	98.23	94.36	37	97.17	98.32	10.25
E105	77124532	11.5687	97.92	93.79	36.74	98.99	98.06	10.16
119	78350974	11.7526	97.67	93	36.23	99.57	98.73	10.39
E37	68778056	10.3167	96.86	91.54	36.88	96.68	98.07	8.84
117	79173444	11.876	97.64	92.94	36.36	99.17	98.48	10.45
E238	70803232	10.6205	97.7	93.32	37.41	96.92	98.11	9.14
E38	60953950	9.14309	96.74	91.27	36.71	96.97	97.7	7.85
80	78479092	11.7719	97.65	92.93	36.41	99.29	98.34	10.37
6	85965976	12.8949	97.84	93.34	36.85	99.09	98.71	11.28
E151	78131112	11.7197	97.92	93.74	37.88	95.21	98.13	9.83
114	79662930	11.9494	97.74	93.17	36.9	99.2	98.33	10.45
E132	71764382	10.7647	97.92	93.8	38.02	94.73	97.91	9.05
132	78122072	11.7183	97.69	93.01	36.29	99.31	98.56	10.32
E19	73494818	11.0242	96.79	91.39	37.28	93.23	98.14	9.07
90	84737836	12.7107	97.77	93.18	36.4	98.75	98.5	11.12
E100	72744808	10.9117	97.89	93.48	36.92	97.09	98.12	9.41
E102	82636366	12.3955	97.43	92.45	37.06	98.99	98.43	10.87
E131	79779490	11.9669	97.85	93.66	37.83	91.75	97.99	9.72
E327	77627880	11.6442	97.89	93.74	37.16	95.97	98.19	9.9
78	73143028	10.9715	97.8	93.34	36.6	98.49	98.22	9.59
E437	75569454	11.3354	97.3	92.18	36.99	98.83	98.56	9.93
E119	79344590	11.9017	97.55	93	36.64	96.38	98.4	10.17
E264	80151546	12.0227	98	93.91	37.86	93.94	97.78	10.01
E253	83613508	12.542	97.38	92.67	37.14	98.03	98.52	10.84
E243	75649728	11.3475	97.74	93.38	37.03	95.38	98.31	9.6
E241	76782606	11.5174	98.12	94.11	36.79	98.38	98.42	10.05
E249	79568828	11.9353	97.2	92.28	37.1	98.47	98.47	10.4
E186	79096128	11.8644	98.03	93.97	36.86	94.93	98.47	9.96
16	84612066	12.6918	97.66	92.96	37.17	97.88	98.5	11.01
94	79293028	11.894	97.72	93.1	36.43	98.81	98.45	10.43
E430	77221284	11.5832	96.82	91.15	36.71	99.4	98.35	10.19
136	78003262	11.7005	97.75	93.17	36.38	99.18	98.44	10.3
E184	65238682	9.7858	97.39	92.52	37.91	94.5	97.62	8.19
E142	72747728	10.9122	97.76	93.38	37.48	93.78	97.99	9.05
E268	78975664	11.8463	97.29	92.35	37.75	90.39	98.11	9.43
E267	82842478	12.4264	98	93.8	37.58	97.67	98.28	10.67
198	81300588	12.1951	97.73	93.15	37.05	98.63	98.47	10.59
E112	65770126	9.86552	97.9	93.77	37.04	97.8	97.94	8.55
E101	73929840	11.0895	97.99	93.68	37.66	96.32	98.12	9.48
E356	81120648	12.1681	97.22	92.22	36.68	98.93	98.37	10.66
E130	74366906	11.155	97.77	93.47	38.12	94.72	97.98	9.35
32	81027964	12.1542	97.71	93.07	36.69	99.14	98.5	10.69
E391	78134802	11.7202	98.21	94.31	37.14	96.78	98.46	10.06
E138	68658470	10.2988	97.85	93.59	36.97	98.31	97.96	8.99
33	88220332	13.233	97.62	92.88	36.73	99.31	98.56	11.65
E348	76989840	11.5485	97.59	93.05	37.09	93.73	98.32	9.59
E343	80234966	12.0352	97.65	93.25	36.96	95.27	98.31	10.17
E288	71363230	10.7045	98.32	94.55	37.56	94.85	98.22	9.02
E269	62522882	9.37843	97.84	93.42	37.72	97.15	97.63	8.03
E270	89799128	13.4699	97.91	93.75	38.39	91.6	98.46	10.91
E468	76179912	11.427	96.98	91.65	37.58	91.07	98.36	9.21
204	80110066	12.0165	97.54	92.71	36.89	98.41	98.53	10.48
E180	76734428	11.5102	97.36	92.45	37.69	93.71	97.8	9.56
15	83945876	12.5919	97.74	93.11	36.84	99.17	98.52	11.08
E406	76746878	11.512	98.13	94.08	36.9	98.22	98.32	10.04
E137	78018944	11.7028	97.86	93.74	37.45	93.89	98.27	9.74
E325	76355098	11.4533	97.53	92.97	37.36	93.88	98.4	9.49
E352	67015014	10.0523	97.29	92.33	37.05	97.5	97.72	8.68
E129	89046648	13.357	97.94	93.83	36.94	97.64	98.41	11.56
E292	79225596	11.8838	97.71	93.42	37.4	92.12	98.11	9.69
E349	69296108	10.3944	97.78	93.42	37.74	95.1	97.92	8.77
E342	77260038	11.589	97.51	92.97	37.71	92.21	98.23	9.46
E376	79685890	11.9529	97.75	93.1	38.76	91.52	97.96	9.71
E308	61932678	9.2899	97.74	93.28	37.85	94.54	97.45	7.8
96	80637872	12.0957	97.54	92.71	36.81	97.74	98.46	10.48
118	78848916	11.8273	97.26	92.07	36.53	99.64	98.4	10.45
E23	75650260	11.3475	96.61	91.01	37.2	95.55	98.34	9.59
194	86207864	12.9312	97.24	92.07	36.68	99.09	98.57	11.35
197	81534324	12.2301	97.74	93.16	36.71	99.32	98.45	10.76
E458	75889278	11.3834	96.35	90.47	37.44	96.26	98.4	9.64
1	85018302	12.7527	97.74	93.11	36.95	99.12	98.51	11.18
E32	74759762	11.214	97.15	92.15	36.94	93.43	98.22	9.21
14	85022806	12.7534	97.71	93.04	36.99	99.78	98.66	11.18
12	84277416	12.6416	97.65	92.94	36.68	99.04	98.55	11.1
E274	64297986	9.6447	97.57	92.98	37.63	96.49	97.96	8.25
E354	76555282	11.4833	97.53	92.95	37.09	96.67	98.31	9.77
210	81739610	12.2609	97.44	92.49	36.86	99.7	98.55	10.77
E76	76412576	11.4619	97.5	92.72	36.77	98.61	98.41	9.98
E123	75298036	11.2947	97.77	93.52	37.24	95.49	98.21	9.51
E118	77196770	11.5795	97.79	93.46	37.52	95.02	98.31	9.69
E360	62679202	9.40188	97.47	92.72	37.98	95.5	97.2	7.77
E205	80936120	12.1404	97.13	91.87	37.2	98.24	98.58	10.48
E404	79695626	11.9543	97.94	93.73	37.81	93.18	97.91	9.88
E158	72683300	10.9025	97.83	93.49	37.43	96.57	97.98	9.27
E449	79578250	11.9367	97.04	91.61	36.76	99.54	98.3	10.52
81	78765444	11.8148	97.77	93.24	36.74	99.15	98.43	10.39
95	80104842	12.0157	97.47	92.54	36.77	99.22	98.01	10.57
149	78266672	11.74	97.47	92.47	36.34	99.61	98.03	10.37
E108	75585802	11.3379	97.53	92.99	36.75	98.38	98.45	9.89
144	82652368	12.3979	97.75	93.18	36.33	99.69	98.35	10.97
209	81624190	12.2436	97.71	93.05	36.49	99.3	98.47	10.79
171	80932584	12.1399	97.65	93	36.24	99.61	98.46	10.74
206	82453612	12.368	97.51	92.62	36.68	98.96	98.68	10.86
E398	78636290	11.7954	97.75	93.29	37.6	92.53	98.56	9.62
88	81819664	12.2729	97.41	92.41	36.49	99.43	98.9	10.82
87	79128778	11.8693	97.46	92.51	36.71	99.28	98.49	10.4
E457	84201930	12.6303	96.57	90.97	37.29	97.6	98.44	10.9
E454	76818678	11.5228	97.5	92.71	37.93	94.26	98.41	9.63
E455	76091226	11.4137	97.29	92.28	38.2	90.64	98.32	9.17
E453	76776730	11.5165	97.14	91.89	37.57	95.56	97.8	9.7
181	78212204	11.7318	97.64	92.93	36.82	98.82	98.4	10.27
121	79409052	11.9114	97.76	93.22	36.6	98.67	98.38	10.42
127	77701676	11.6553	97.81	93.35	36.41	98.96	98.39	10.24
E467	75949318	11.3924	97.04	91.65	36.79	99.52	98.46	10.04
120	81198470	12.1798	97.65	92.94	36.27	99.32	98.59	10.71
179	78596818	11.7895	97.66	92.99	36.82	98.55	98.07	10.24
E22	79766990	11.965	96.72	91.21	37.49	97.06	98.12	10.14
183	79105316	11.8658	97.7	93.08	36.5	99.16	98.55	10.37
E462	83608988	12.5413	96.42	90.56	36.88	98.75	98.88	10.95
E20	75781194	11.3672	96.74	91.2	36.78	96.68	98.45	9.73
E400	79103216	11.8655	98.04	93.95	36.79	98.22	98.4	10.31
201	83059994	12.459	97.28	92.06	36.53	99.44	98.96	10.99
E466	79837516	11.9756	97.2	92.02	37.27	97.54	98.54	10.36
99	79400772	11.9101	97.83	93.32	36.24	99.37	98.55	10.51
98	78037314	11.7056	97.54	92.71	36.22	99.28	98.55	10.31
E25	75546846	11.332	96.67	91.11	36.92	96.07	98.24	9.64
91	80415772	12.0624	97.54	92.64	36.38	99.77	98.65	10.69
5	81779288	12.2669	97.75	93.18	36.75	99.37	98.57	10.8
211	81116976	12.1675	97.68	92.96	36.8	99.54	98.58	10.73
24	82351374	12.3527	97.74	93.11	36.72	98.57	98.83	10.81
106	77886446	11.683	97.74	93.21	36.1	99.63	98.39	10.32
E28	74715824	11.2074	96.81	91.45	36.41	99.58	98.7	9.87
25	80686518	12.103	97.63	92.81	36.59	99.86	98.83	10.72
26	80871466	12.1307	97.15	91.8	36.66	98.34	98.89	10.58
9	82143022	12.3215	97.52	92.61	36.84	98.65	98.54	10.77
100	78414280	11.7621	97.67	93	36.19	99.52	98.58	10.39
E24	75742280	11.3613	97.02	91.81	36.79	98.82	98.37	9.94
207	81398492	12.2098	97.64	92.89	36.6	99.55	98.64	10.79
E33	76660472	11.4991	96.85	91.44	36.77	97.13	98.69	9.88
E401	94381088	14.1572	98.25	94.4	36.43	99.39	98.42	12.49
E210	77533220	11.63	97.51	92.95	37.14	95.77	98.42	9.88
72	79440174	11.916	97.64	92.95	36.42	99.25	98.75	10.5
E375	89727038	13.4591	97.59	92.76	37.51	95.89	98.41	11.41
126	78034928	11.7052	97.44	92.49	36.88	97.92	98.4	10.17
E420	76164750	11.4247	96.88	91.27	36.94	97.13	98.5	9.84
E36	62250436	9.33757	96.65	91.06	37.14	97.36	97.65	8.05
E329	78301150	11.7452	97.96	93.88	36.7	98.6	98.26	10.28
E14	77297632	11.5946	98.43	94.84	36.71	98.81	98.63	10.17
77	84321796	12.6483	97.74	93.17	36.76	97.7	98.55	10.95
E410	78799894	11.82	98.24	94.43	37.41	91.01	98.45	9.54
64	83734106	12.5601	97.67	93	36.36	99.74	98.71	11.11
E302	82603638	12.3905	97.46	92.69	37.37	94.29	98.29	10.35
E316	66462568	9.96939	98.19	94.33	36.81	98.31	97.85	8.7
E386	71221210	10.6832	98.26	94.4	38.47	91.01	98.08	8.63
E284	78302144	11.7453	97.83	93.55	37.35	93.13	98.35	9.7
200	83615816	12.5424	97.86	93.42	36.94	98.68	98.67	10.93
135	79201504	11.8802	97.7	93.03	36.18	99.5	98.68	10.5
E266	70869214	10.6304	97.58	92.77	37.17	98.12	98.25	9.25
185	86725002	13.0088	97.21	92	36.54	99.56	98.79	11.49
178	78735398	11.8103	97.64	92.95	36.54	98.95	98.56	10.36
E393	92225394	13.8338	97.91	93.99	36.75	98.75	98.82	12.09
E374	80211414	12.0317	97.27	92.27	37.06	95.9	98.39	10.23
E355	77459390	11.6189	97.49	92.79	36.79	95.31	98.33	9.81
E306	72032028	10.8048	97.98	93.8	38.15	93.39	97.93	8.96
E291	76986124	11.5479	97.79	93.45	37	98.3	98.5	10.07
E324	59923360	8.9885	97.75	93.34	37.45	95.64	97.08	7.63
E361	79120190	11.868	97.53	92.75	36.53	99.11	98.47	10.44
E290	78205752	11.7309	97.84	93.51	37.11	99.05	98.29	10.23
E301	100179736	15.027	97.72	93.26	37.71	94.67	98.77	12.61
E367	80681610	12.1022	98.12	94.11	36.89	99.52	98.39	10.69
E304	82761974	12.4143	97.95	93.82	37.52	92.85	98.6	10.22
E296	56373364	8.456	97.79	93.39	37.17	96.92	96.69	7.27
E299	77330602	11.5996	97.87	93.61	37.23	95.85	98.45	9.79
E294	74347824	11.1522	97.8	93.52	37.25	96.78	98.32	9.57
E371	74589242	11.1884	98.07	94.06	37.65	93.03	98.17	9.2
E369	70745810	10.6119	98.24	94.37	37.49	97.18	97.98	9.13
E366	77993264	11.699	98.01	93.86	37.17	98.43	98.53	10.21
E303	89044890	13.3567	97.59	92.96	37.36	94.63	98.44	11.15
E362	76648856	11.4973	98.29	94.55	37.13	96.56	98.56	9.86
E368	76756026	11.5134	98.01	93.83	37.05	99.29	98.29	10.15
E381	76266640	11.44	98.23	94.37	36.84	98.64	98.55	10.02
E276	79191896	11.8788	96.87	91.47	37.72	90.48	98.17	9.51
E337	76727456	11.5091	98.1	94.08	36.68	98.87	98.49	10.1
E370	77342116	11.6013	98.18	94.24	37.05	98.05	98.33	10.1
E289	66341624	9.95124	97.89	93.7	37.62	95	97.7	8.39
E389	80440346	12.0661	97.79	93.3	36.59	98.83	98.55	10.59
E387	78465754	11.7699	97.98	93.82	37.21	93.43	98.41	9.76
E378	75552960	11.3329	97.94	93.81	36.92	92.88	98.35	9.34
E333	77268018	11.5902	97.67	93.32	37.09	93.42	98.28	9.6
E317	88650130	13.2975	97.68	93.17	36.5	97.48	98.7	11.5
E275	69793986	10.4691	97.58	92.82	37.56	95.83	98.04	8.91
E271	75524692	11.3287	97.95	93.7	37.64	91.17	98.22	9.15
E347	77175030	11.5763	97.08	91.96	37.08	93.94	98.25	9.62
60	84695332	12.7043	97.77	93.2	36.39	99.44	98.76	11.21
E412	81913712	12.2871	97.75	93.24	36.64	98.23	98.4	10.71
49	82674338	12.4012	97.77	93.23	36.73	98.56	98.41	10.84
E411	75305792	11.2959	98.24	94.37	36.89	97.17	98.09	9.74
E413	57674978	8.65125	97.97	93.76	36.79	97.16	97.61	7.45
61	84486942	12.673	97.65	92.88	36.43	99.23	98.61	11.16
E321	80060806	12.0091	97.66	93.11	36.79	97.15	98.44	10.34
E314	75363874	11.3046	97.93	93.77	36.98	97.08	98.22	9.73
57	85734512	12.8602	97.85	93.4	36.43	99.47	98.82	11.35
E310	82149598	12.3224	97.81	93.46	37.19	97.02	98.44	10.61
E279	70614150	10.5921	97.64	92.95	37.41	98.09	97.86	9.22
E403	73231276	10.9847	98.16	94.26	36.94	97.43	98.57	9.48
E365	81301908	12.1953	97.49	92.54	36.79	96.12	98.6	10.37
E351	77986262	11.6979	97.52	92.92	37.61	92.27	98.12	9.49
E287	77944208	11.6916	97.9	93.7	37.37	94.12	98.26	9.72
E280	107549356	16.1324	97.49	92.35	37.1	97.17	98.62	13.86
E278	61006382	9.15096	98.04	93.82	37.25	97.93	97.62	7.96
E319	74972206	11.2458	97.97	93.8	36.87	97.88	97.99	9.77
E313	75438636	11.3158	97.71	93.34	36.99	93.12	98.18	9.33
E364	76916232	11.5374	97.81	93.46	36.58	94.76	98.41	9.65
E363	87061816	13.0593	97.82	93.33	36.78	97.41	98.55	11.28
E277	69916952	10.4875	97.58	92.94	37.47	97.59	97.82	9.07
E346	77333232	11.6	97.31	92.49	37.49	97.16	98.18	9.8
E345	80380744	12.0571	97.45	92.8	37.09	95.42	98.52	10.16
53	83518014	12.5277	97.9	93.59	36.56	98.64	98.49	10.96
184	85694608	12.8542	97.73	93.17	36.68	99.47	98.53	11.29
E297	67309004	10.0964	97.89	93.69	37.3	97.46	97.87	8.73
30	80479902	12.072	97.58	92.8	36.73	98.21	98.61	10.52
58	84056340	12.6085	97.95	93.63	36.45	99.24	98.64	11.1
E273	56684744	8.50271	98.02	93.81	37.78	95.8	97.18	7.22
27	85302642	12.7954	97.71	93.06	36.77	98	98.67	11.12
E372	78656064	11.7984	98.13	94.15	37.86	94.76	98.2	9.93
E117	80383814	12.0576	97.85	93.63	36.9	98.05	98.38	10.48
218	82241658	12.3362	97.77	93.16	36.82	98.59	98.92	10.78
187	101817384	15.2726	97.39	92.43	36.85	98.8	98.71	13.29
E336	76648998	11.4973	97.25	92.39	37.43	91.3	98.17	9.27
E286	62818368	9.42276	97.86	93.57	37.49	96.29	97.67	8.06
E283	78141524	11.7212	97.76	93.45	37.79	90.7	98.18	9.42
133	81403442	12.2105	97.21	91.93	36.27	99.41	98.59	10.77
E281	78729468	11.8094	97.76	93.48	37.32	93.18	98.28	9.76
E173	78384608	11.7577	97.38	92.41	36.9	96.49	98.47	10.06
E192	72989128	10.9484	97.61	92.94	37.01	97.88	98.39	9.5
E179	65540164	9.83102	97.73	93.21	37.37	97.64	97.74	8.52
46	83355878	12.5034	97.85	93.41	36.88	97.83	98.53	10.86
E272	77820402	11.6731	97.8	93.39	37.28	99.18	98.43	10.21
E125	76737428	11.5106	97.71	93.31	36.9	98.75	98.41	10.07
E140	74443138	11.1665	97.69	93.26	36.78	98.82	98.25	9.79
67	74121886	11.1183	97.51	92.68	36.78	97.73	98.53	9.6
E153	73638650	11.0458	97.73	93.26	37.84	93.23	97.89	9.13
68	81413354	12.212	97.33	92.25	36.78	99.3	98.57	10.64
E126	75737452	11.3606	97.92	93.82	37.42	97.5	98.36	9.73
66	80524806	12.0787	97.49	92.59	36.73	99.6	98.62	10.56
93	81645950	12.2469	97.67	93.01	36.64	96.69	98.63	10.5
E59	69051050	10.3577	96.81	91.47	37.53	94.16	98.1	8.64
E193	79388602	11.9083	97.32	92.28	36.92	98.68	98.49	10.38
E263	66916822	10.0375	97.66	93.06	37.37	98.13	98.17	8.74
E120	80202364	12.0304	97.8	93.59	36.95	96.33	98.56	10.27
E388	80715506	12.1073	97.84	93.43	36.4	99.18	98.58	10.66
E203	82207680	12.3312	97.36	92.39	37.53	94.83	98.44	10.26
E80	76736040	11.5104	97.78	93.41	36.91	93.48	98.6	9.5
E154	57565314	8.6348	97.46	92.68	36.9	97.11	97.38	7.44
E208	57637340	8.6456	97.37	92.3	36.65	97.5	97.6	7.48
E174	60003920	9.00059	97.47	92.57	36.95	97.28	97.74	7.77
E141	69635172	10.4453	97.91	93.64	36.88	98.52	97.77	9.14
E332	59908542	8.98628	97.63	93.07	36.74	97.27	97.42	7.76
E328	77758878	11.6638	97.65	93.21	36.85	92.39	98.05	9.55
E380	73178834	10.9768	97.93	93.66	36.79	98.24	98.21	9.57
E322	76759876	11.514	97.73	93.34	36.9	92.75	98.12	9.46
E74	74830664	11.2246	97.59	92.92	37.13	92.55	98.25	9.21
E35	76243660	11.4365	96.61	91.03	37.07	91.17	98.35	9.22
E448	76118626	11.4178	97.26	92.12	36.8	99.32	98.27	10.06
E443	76506762	11.476	97.46	92.6	37.47	97.51	98.73	9.92
E98	82429840	12.3645	97.65	93.03	37.83	90.31	98.26	9.9
E97	55294780	8.29422	97.89	93.51	38.09	92.33	97.46	6.8
E71	73273092	10.991	97.53	92.74	36.8	96.19	98.57	9.38
E58	109005574	16.3508	97.91	94	36.78	92.91	98.75	13.47
E195	73459672	11.019	96.8	91.19	37.1	96.16	98.42	9.37
E165	86823264	13.0235	97.28	92.35	37.07	97.14	98.54	11.13
E84	91459542	13.7189	97.84	93.78	36.66	96.66	98.67	11.76
E145	82668794	12.4003	97.12	91.81	37.16	95.13	98.37	10.45
E175	76173790	11.4261	97.58	92.91	37.53	93.76	98.23	9.49
E168	73144606	10.9717	97.49	92.64	36.97	97.79	98.22	9.53
E166	78435228	11.7653	97.29	92.28	37.29	91.68	98.36	9.55
E196	85592654	12.8389	97.41	92.53	37.19	92.76	98.41	10.54
E191	87588282	13.1382	97.51	92.74	37.31	96.95	98.54	11.19
E77	79543122	11.9315	97.78	93.42	37.67	91.23	98.32	9.59
E99	82061208	12.3092	97.86	93.48	37.8	92.17	98.44	10.06
130	81389880	12.2085	97.63	92.91	36.54	98.01	98.49	10.62
E422	76506824	11.476	97.11	91.76	36.79	96.42	98.41	9.81
E167	74240750	11.1361	97.53	92.76	37.45	97.58	98.34	9.46
E72	85374308	12.8061	97.92	94	37.17	95.29	98.31	10.79
39	90095038	13.5143	97.13	91.85	36.91	98	98.68	11.72
E187	73419992	11.013	97.3	92.29	37.47	90.76	97.81	8.86
E185	85301902	12.7953	97.19	92.03	37.69	92.17	98.29	10.44
E178	77107534	11.5661	97.32	92.28	37.17	98.8	97.95	10.13
E169	69762354	10.4644	97.39	92.45	37.08	97.15	97.9	9.02
E182	75335786	11.3004	96.89	91.44	37.63	97.07	98.1	9.7
E134	58611730	8.79176	97.83	93.59	37.69	95.4	97.26	7.44
E181	70254668	10.5382	97.48	92.66	37.28	97.56	97.94	9.11
E136	76347630	11.4521	97.66	93.29	37.36	90.71	98.16	9.18
E83	73279768	10.992	97.51	92.7	36.54	98.31	98.38	9.59
E78	76685284	11.5028	97.82	93.5	37.24	92.6	98.35	9.43
E318	65901150	9.88517	97.29	92.33	37.08	97.7	98.03	8.56
E79	70554906	10.5832	97.3	92.28	36.75	93.53	98.13	8.75
E69	74275102	11.1413	97.6	92.98	37.41	91.34	98.22	9
54	82580682	12.3871	97.47	92.57	36.6	98.85	98.57	10.85
E62	29604089	4.44062	97.57	92.89	36.37	98.97	91.35	3.69
E409	79292452	11.8939	98.14	94.1	36.71	96.65	98.39	10.2
E54	75257748	11.2887	95.68	88.86	37.5	90.61	97.96	9.04
E53	75053196	11.258	97.27	92.4	36.79	97.16	98.18	9.69
E86	64850634	9.7276	97.54	92.76	36.78	96.96	98.21	8.38
E56	75001864	11.2503	96.71	91.21	36.79	94.5	98.21	9.41
E87	75778446	11.3668	97.54	92.82	36.43	96.2	98.5	9.7
E85	59824436	8.97367	97.29	92.24	36.78	96.5	97.88	7.69
E81	64388680	9.6583	97.67	93.06	36.7	98.03	98.09	8.41
E61	50523207	7.5785	97.49	92.72	36.52	99.27	88.14	3.16
52	83270884	12.4906	97.79	93.31	36.59	98.54	98.53	10.9
E315	75884980	11.3827	97.89	93.8	37.1	90.73	98.29	9.16
E95	64259812	9.63897	97.27	92.2	36.9	95.22	98.03	8.15
86	78878252	11.8317	97.71	93.06	36.61	98.93	98.69	10.39
131	77557204	11.6336	97.75	93.15	36.49	99.42	98.59	10.23
E67	73225496	10.9838	95.52	88.9	37.27	93.41	98.05	9.02
E51	69054556	10.3582	96.96	91.71	37.18	96.24	98.16	8.83
E68	65418612	9.81279	97.76	93.31	37.95	96.07	96.39	8.37
E183	75584592	11.3377	97.27	92.23	37.41	98	98.3	9.82
E75	73210570	10.9816	97.67	93.1	36.67	94.95	98.39	9.25
E73	77129824	11.5695	97.14	91.94	36.86	97.24	98.17	9.98
E70	103579544	15.5369	98.2	94.66	37.59	95.75	98.58	13.19
45	79435422	11.9153	97.75	93.15	36.76	99.06	98.54	10.48
E446	77204964	11.5807	97.67	93.08	36.91	99.65	98.41	10.22
E55	64496838	9.67453	96.6	91	37.14	96.37	97.79	8.25
E52	72383092	10.8575	97.95	93.68	36.57	98.87	98.3	9.53
E82	74463350	11.1695	96.8	91.2	36.95	95.09	98.37	9.41
E439	85333730	12.8001	96.6	91.09	37.1	92.87	98.32	10.51
E65	75778240	11.3667	97	91.83	37.21	96.88	98.01	9.72
E50	74545894	11.1819	96.95	91.73	36.55	97.94	98.42	9.7
E46	58511060	8.77666	97.11	92.07	36.98	90.01	97.4	7
E44	75018856	11.2528	96.84	91.5	36.83	96.77	98.37	9.63
E96	87561168	13.1342	97.52	92.73	36.31	97.62	98.6	11.37
E47	73098834	10.9648	97.03	91.9	37.22	92.52	98.3	8.97
E66	78502710	11.7754	96.47	90.76	37.17	94.06	98.09	9.8
E48	86594618	12.9892	97.5	92.95	36.56	99.29	98.66	11.42
E49	73222382	10.9834	96.46	90.87	36.76	86.9	98.1	8.44
E64	75149402	11.2724	96.52	90.86	37.05	92.6	98.25	9.23
E45	75398382	11.3098	96.83	91.51	37.45	93.71	98.27	9.38
E408	76552850	11.4829	98.22	94.4	36.72	98.89	98.44	10.08
E15	75526368	11.329	97.02	91.61	36.47	98.71	98.37	9.92
37	85118812	12.7678	97.55	92.72	36.85	98.43	98.66	11.1
E311	76716722	11.5075	98.05	94.05	36.61	98.89	98.4	10.1
E285	77225884	11.5839	97.76	93.4	37.11	97.51	98.45	10.01
E162	79069396	11.8604	97.52	92.7	36.91	99.32	98.5	10.42
E128	81989344	12.2984	97.85	93.61	36.84	98.62	98.44	10.76
44	86077344	12.9116	97.91	93.55	37.22	99.4	98.63	11.25
47	83724472	12.5587	97.89	93.51	37.03	98.84	98.61	10.92
E353	77068220	11.5602	97.09	91.99	37.46	97.33	98.14	9.86
82	78788746	11.8183	97.33	92.27	36.91	99.06	98.42	10.29
70	79481538	11.9222	97.87	93.5	36.71	99.19	98.44	10.41
129	82303886	12.3456	97.6	92.86	36.68	98.45	98.67	10.75
50	92715108	13.9073	97.43	92.53	36.61	99.43	98.96	12.22
E121	78025124	11.7038	97.8	93.6	37.83	90.28	98.42	9.32
E110	78170066	11.7255	97.68	93.25	36.93	98.08	98.37	10.2
38	78052768	11.7079	97.76	93.21	36.94	99.18	98.15	10.24
E104	88145390	13.2218	97.81	93.61	37.37	90.41	98.32	10.49
E124	61118446	9.16777	97.88	93.71	37.61	95.63	97.53	7.76
E395	80029210	12.0044	97.87	93.57	36.93	97.46	98.37	10.35
E60	74820670	11.2231	96.59	90.94	36.85	95.09	98.44	9.37
E350	67423292	10.1135	97.58	93.02	37.7	97.1	97.72	8.61
E63	74872722	11.2309	96.65	91.09	36.81	92.74	98.19	9.21
E170	81472342	12.2209	97.48	92.61	37.59	94.54	98.18	10.18
E143	55011282	8.25169	97.56	92.93	38.24	94.54	96.64	6.86
E344	78133870	11.7201	97.62	93.24	37.43	92.48	98.35	9.53
E194	75513780	11.3271	97.44	92.6	37.91	94.8	98.17	9.44
E164	91266248	13.6899	97.44	92.6	37.24	92.61	98.37	11.21
E113	77985786	11.6979	97.92	93.9	37.33	93.72	98.36	9.64
E106	72950784	10.9426	98.04	94	37.03	96.27	98.13	9.34
E305	65684956	9.85274	98.01	93.88	37.11	98.26	97.8	8.57
E149	56783820	8.51757	97.55	92.88	37.51	96.86	97.01	7.28
E109	77517290	11.6276	97.98	93.92	37.32	97.55	98.21	10.05
E419	76922178	11.5383	96.82	91.1	36.84	98.94	98.54	10.08
E416	77002230	11.5503	98.07	94.02	37.68	96.74	97.5	9.83
E155	72131338	10.8197	97.76	93.32	37.12	90.15	97.47	8.66
E330	66015054	9.90226	98	93.94	36.85	97.44	97.85	8.57
E407	67594632	10.1392	97.56	92.8	37.2	97.1	97.87	8.74
E159	72232002	10.8348	97.88	93.68	38.22	89.82	97.59	8.6
E147	84990538	12.7486	97.15	92.14	38.18	91.86	98.11	10.29
E326	70798146	10.6197	97.84	93.54	36.81	97.89	97.83	9.23
E161	85133722	12.7701	97.11	91.85	37.51	91.27	98.26	10.34
E160	64446546	9.66698	97.26	92.09	37.03	97.55	97.88	8.36
E199	58098992	8.71485	97.66	93.02	37.16	95.78	97.59	7.4
E197	83073280	12.461	97.21	92.11	37.34	91.83	98.36	10.14
42	80313530	12.047	97.74	93.17	37.13	98.12	98.35	10.36
E206	75672104	11.3508	97.08	91.76	36.86	97.61	98.42	9.83
E357	67615496	10.1423	97.09	91.86	36.73	97.81	97.88	8.8
E198	80922784	12.1384	97.49	92.68	36.82	98.1	98.44	10.56
E190	80596398	12.0895	97.57	92.85	36.81	98.4	98.42	10.55
E115	68049834	10.2075	98.09	94.17	37.41	96.83	97.95	8.77
74	83942078	12.5913	97.82	93.32	36.74	99.28	98.57	10.99
E417	76646190	11.4969	98.26	94.47	37.14	99.15	98.24	10.03
E114	82996762	12.4495	97.96	93.91	37.65	93.91	98.19	10.25
E107	73797638	11.0696	97.93	93.8	37.6	93.64	98.05	9.11
75	82873970	12.4311	97.51	92.57	36.78	99.01	98.5	10.83
E122	79355456	11.9033	97.83	93.7	37.63	93.06	98.15	9.8
E177	61664742	9.24971	97.45	92.79	37.91	96.8	96.95	7.87
41	81557692	12.2337	97.58	92.83	37.84	96.7	98.19	10.3
E202	79819016	11.9729	97.43	92.53	37.14	97.84	98.44	10.35
E204	52938786	7.94082	97.12	91.9	37.63	92.04	96.97	6.47
E135	50925528	7.63883	97.9	93.8	37.87	94.6	96.3	6.39
E150	76755526	11.5133	97.78	93.44	37.41	94.18	98.15	9.51
E146	77667598	11.6501	97.58	93.03	37.35	91.27	98	9.4
E148	59798048	8.96971	97.63	93.01	37.28	96.27	96.98	7.67
E127	59490612	8.92359	97.93	93.81	37.1	97.37	97.5	7.68
E111	77121226	11.5682	97.64	93.21	37.52	93.19	98.11	9.45
55	84318002	12.6477	97.86	93.42	36.59	99.23	98.76	11.08
E144	77509118	11.6264	97.29	92.3	37.47	98.09	98.16	9.94
E139	78456626	11.7685	97.39	92.61	37.28	96.87	98.38	10.1
71	81615082	12.2423	97.64	92.9	36.44	99.49	98.38	10.8
69	83587778	12.5382	97.87	93.46	36.5	99.42	98.59	11.05
48	71870150	10.7805	97.38	92.2	37.01	98.94	98.51	9.38
137	79500510	11.9251	97.58	92.78	36.45	99.48	98.51	10.53
E21	77172976	11.5759	96.93	91.69	36.93	95.46	98.37	9.78
E16	77014192	11.5521	97.42	92.52	36.79	97.6	98.58	10
E261	65765530	9.86483	98.15	94.14	37.23	98.11	98.05	8.6
E260	53572226	8.03583	98.09	93.99	37.69	95.75	97.36	6.83
E213	77554610	11.6332	98.2	94.33	36.94	96.66	98.45	9.98
E11	73553922	11.0331	97.45	92.58	37.07	96.5	98.37	9.44
E176	83461124	12.5192	97.33	92.33	38.31	96.29	97.97	10.58
E397	77740470	11.6611	98	93.77	36.88	97.28	98.57	10.01
22	80784934	12.1177	97.63	92.85	37.04	99.21	98.48	10.61
203	84746584	12.712	97.41	92.42	36.88	98.45	98.78	11.08
E18	78040690	11.7061	96.5	90.8	37.12	94.82	98.23	9.75
E392	76369882	11.4555	98.13	94.15	36.79	99.33	98.48	10.1
E262	72918182	10.9377	97.88	93.59	37.5	91.82	98.1	8.91
E103	76750264	11.5125	97.86	93.7	37	93.3	98.42	9.52
E237	79542066	11.9313	97.68	93.25	37.5	96.54	98.49	10.13
E227	53915906	8.08739	97.71	93.45	40.17	90.55	96.23	6.35
E220	69235436	10.3853	97.56	92.93	37.02	98.13	98.01	9.05
E233	77677696	11.6517	97.59	93.11	37.26	94.63	98.11	9.75
E43	58048312	8.70725	96.92	91.7	37	96.36	97.42	7.43
E221	84046800	12.607	97.64	93.22	37.39	93.19	98.36	10.37
E231	67284132	10.0926	97.77	93.41	37.31	97.21	97.94	8.71
E90	66935744	10.0404	97.85	93.51	37.24	96.82	97.89	8.59
E91	71955242	10.7933	97.75	93.31	37.69	94.85	98.28	9.09
E226	78896804	11.8345	97.32	92.6	37.31	92.56	98.43	9.69
E42	61547454	9.23212	96.88	91.54	37.35	93.46	97.39	7.64
E215	67020032	10.053	97.77	93.42	37.66	96.9	97.81	8.62
E214	78035912	11.7054	97.1	92.03	37.16	96.11	98.39	9.96
E423	77190734	11.5786	96.89	91.34	36.92	96.96	98.6	9.92
E441	76053280	11.408	97.05	91.69	37.16	99.03	98.34	9.92
E447	79199844	11.88	97.31	92.21	36.91	99.63	98.45	10.43
E236	78099736	11.715	97.25	92.33	37.54	93.63	98.21	9.68
E40	78229074	11.7344	96.8	91.44	36.95	93.02	98.13	9.55
E189	78749114	11.8124	97.3	92.28	37.4	96.76	98.26	9.99
E428	77857136	11.6786	95.78	89.02	37.01	99.44	98.37	10.19
E30	80688790	12.1033	96.73	91.32	36.91	96.74	98.17	10.28
E435	77533844	11.6301	97.38	92.42	37.55	99.6	98.1	10.08
E427	74833104	11.225	97.24	92.04	36.97	98.63	98.23	9.75
E434	76384122	11.4576	96.55	90.65	37.44	99.42	98.14	9.98
83	74205038	11.1308	97.71	93.03	36.79	98.25	98.23	9.69
E92	68206456	10.231	97.12	91.86	36.56	98.51	98.06	8.94
E219	54237484	8.13562	97.56	93.07	37.3	96.34	97.34	6.95
E436	76529930	11.4795	97.35	92.33	37.06	99.24	98.25	10.09
196	84510686	12.6766	97.72	93.05	36.84	98.61	98.35	11.02
E41	73877322	11.0816	96.84	91.5	36.62	96.57	98.26	9.47
E88	75930838	11.3896	97.41	92.48	37.26	93.67	98.09	9.42
E442	75615170	11.3423	97.21	92.05	37.38	99.68	98.11	9.89
E211	70872284	10.6308	97.48	92.96	37.54	91.4	97.91	8.59
E217	77404732	11.6107	97.41	92.69	36.97	99.41	98.73	10.2
E201	79398596	11.9098	97.62	92.97	36.81	99.63	98.69	10.51
E229	70764628	10.6147	97.52	92.93	37.32	97.2	97.91	9.14
E228	79478858	11.9218	97.71	93.42	37.76	90.77	98.27	9.58
E232	79309470	11.8964	97.57	92.98	36.91	97.09	98.22	10.24
E216	68456514	10.2685	97.74	93.52	37.57	96.91	97.85	8.82
E12	76220224	11.433	97.28	92.18	36.97	96.68	98.31	9.79
E26	74867006	11.2301	96.98	91.77	36.65	98.05	98.08	9.74
E209	75437148	11.3156	97.1	91.78	37.03	97.76	98.16	9.81
E212	75267892	11.2902	97.56	92.99	37.26	94.41	97.89	9.43
E433	75958856	11.3938	97.25	92.09	36.94	99.57	98.06	10.06
E425	78391780	11.7588	96.5	90.36	36.56	99.57	98.27	10.37
180	79790540	11.9686	97.77	93.27	36.82	98.52	97.92	10.44
E5	69900404	10.4851	97.35	92.31	36.84	97.98	97.28	9.11
E338	76634926	11.4952	96.87	91.47	36.95	98.12	97.91	9.97
E230	61696458	9.25447	97.45	92.78	37.28	96.62	97.25	7.93
E225	64130098	9.61951	97.71	93.28	37.08	98.37	97.16	8.39
E224	70321584	10.5482	97.52	92.84	37.08	98.43	97.82	9.21
E239	83540548	12.5311	97.82	93.59	37.93	97.28	98.25	10.69
E10	75906636	11.386	97.33	92.38	37.09	90.61	97.89	9.14
E93	50921070	7.63816	97.56	92.77	37.06	95.75	96.74	6.49
E223	70089556	10.5134	97.54	92.88	37.34	98.26	97.84	9.09
E34	58491846	8.77378	96.53	90.89	37.13	95.64	97.22	7.4
E429	76307682	11.4462	97.35	92.31	36.8	99.47	98.21	10.09
E335	75559668	11.334	97.09	91.89	37.13	98.59	97.88	9.89
E426	80690330	12.1035	96.83	91.08	36.62	99.62	98.26	10.68
E431	76549860	11.4825	97.18	91.93	37.21	98.62	98.04	9.93
E234	78471796	11.7708	97.68	93.23	37.24	97.14	98.03	10.07
